# Supplementary material for: From Dysbiosis to Healthy Skin: Major Contributions of Cutibacterium acnes to Skin Homeostasis
Source: MDPI journal article supplement (doi:10.3390/microorganisms9030628), 2021-03-18
Supplement: s1 [file s1]

**Supplementary table 1.** Interventional studies with topical bacteriotherapy in dermatology.

| Target            | Source                                    | Participants           | Probiotic Strains                                                                                                                          | Strain origin         | Skin commensal | Downstream process | Viable | Dose                                                                                               | Main results                                                                                                                                                                                          |
|-------------------|-------------------------------------------|------------------------|--------------------------------------------------------------------------------------------------------------------------------------------|-----------------------|----------------|--------------------|--------|----------------------------------------------------------------------------------------------------|-------------------------------------------------------------------------------------------------------------------------------------------------------------------------------------------------------|
| Atopic dermatitis | Nakatsuji et al, 2018 <sup>1</sup>        | 14 Adults              | <i>Staphylococcus epidermidis</i> ,<br><i>Staphylococcus hominis</i> ,<br><i>Staphylococcus capitis</i> ,<br><i>Staphylococcus warneri</i> | Skin                  | YES            | freeze-dried       | YES    | Single dose<br>$1 \times 10^5$<br>CFU/cm <sup>2</sup>                                              | After 1 week “>90% reduction in <i>S. aureus</i> load ( $p = 0.013$ ) and significant improvements in local EASI ( $p = 0.029$ ).”                                                                    |
| Atopic dermatitis | Myles et al, 2018 <sup>2</sup>            | 10 Adults              | <i>Roseomonas mucosa</i>                                                                                                                   | Skin                  | YES            | freeze-dried       | YES    | Twice weekly for 6 weeks (increasing dosages $4 \times 10^3$ , $4 \times 10^4$ , $4 \times 10^5$ ) | “Significant reduction in pruritus ( $p < 0.01$ ), SCORAD values, and steroid usage ( $p < 0.05$ ).”                                                                                                  |
| Atopic dermatitis | Blanchet-Rethore et al, 2017 <sup>3</sup> | 21 Adults              | <i>Lactobacillus johnsonii</i>                                                                                                             | Vagina                | NO             | heat inactivated   | NO     | Twice daily for 21 days                                                                            | “Reduction in <i>S. aureus</i> load, correlating with $4.93 \pm 8.23$ decrease in mean SCORAD between days 8 to 28 ( $p = 0.012$ ).”                                                                  |
| Atopic dermatitis | Di Marzio et al, 2003 <sup>4</sup>        | 11 Adults              | <i>Streptococcus thermophilus</i>                                                                                                          | Skin, plant and dairy | NO             | sonicated          | NO     | Twice daily for 14 days                                                                            | Significant improvement “in scores of erythema, pruritus, vesiculation, and scaling ( $p = 0.003$ ). Stratum corneum ceramide levels increased ( $12.86 \pm 1.97 \text{ pmol/cm}^2$ ; $p = 0.002$ ).” |
| Atopic dermatitis | Gueniche et al, 2008 <sup>5</sup>         | 75 Adults and Children | <i>Vitreoscilla filiformis</i>                                                                                                             | Thermal water         | NO             | lysate             | NO     | Once daily for 30 days                                                                             | “Significant reduction of SCORAD values ( $p = 0.0044$ ), pruritus ( $p = 0.0171$ ), loss of sleep ( $p = 0.0074$ )”                                                                                  |

|                       |                                                 |                                     |                                             |                                    |     |              |     |                                                        |                                                                                                                                                                                            |
|-----------------------|-------------------------------------------------|-------------------------------------|---------------------------------------------|------------------------------------|-----|--------------|-----|--------------------------------------------------------|--------------------------------------------------------------------------------------------------------------------------------------------------------------------------------------------|
| Atopic dermatitis     | Butler, 2020 <sup>6</sup>                       | 36 adults                           | <i>Lactobacillus reuteri</i> (DSM 17938)    | Gastrointestinal                   | NO  | freeze-dried | YES | Twice daily for 8 weeks (10 <sup>8</sup> CFU/gram)     | Both vehicle and verum compared to baseline improved significantly (SCORAD index). No significant difference in the overall effect between the control and treatment                       |
| Acne vulgaris         | AOBiome Clinical trial (2018) (not published *) | 358 Adults                          | <i>Nitrosomonas eutropha</i>                | Amerindian skin (not Western skin) | NO  | NA           | YES | NA                                                     | "2-point reduction in Investigator's Global Assessment, ( $p = 0.03$ ) at 12 weeks. Number of inflammatory lesions also reduced ( $p = 0.028$ ). " (results from AOBiome press-release)    |
| Acne vulgaris         | Karoglan et al, 2019 <sup>7</sup>               | 14 Subjects                         | <i>Cutibacterium acnes</i> (C3, K8, A5, F4) | Skin                               | YES | NA           | YES | Twice daily for 5 weeks (10 <sup>6</sup> CFU/g)        | Significant reduction in non-inflamed lesions (C3 + K8 $p = 0.029$ , C3 + K8 + A5 + F4, $p = 0.036$ )                                                                                      |
| Seborrheic dermatitis | Geuniche et al, 2008 <sup>8</sup>               | 60 Adults                           | <i>Vitreoscilla filiformis</i>              | Thermal water                      | NO  | NA           | NO  | Once daily for 4 weeks                                 | "Significant reduction in erythema and scaling treated vs vehicle (Chi-square, $P < 0.0001$ )"                                                                                             |
| Non-Healing Ulcers    | Peral et al, 2010 <sup>9</sup>                  | 34 diabetic and non-diabetic adults | <i>Lactobacillus plantarum</i>              | Gastrointestinal                   | NO  | NA           | YES | Daily for 10 days (whole culture 10 <sup>5</sup> / ml) | "10 days of treatment resulted in a 3-fold decrease in biofilm producing bacteria ( $p < 0.001$ ). After 30 days, 43% of diabetics and 50% of non-diabetics experienced ulcer resolution." |
| Burns                 | Peral et al, 2009 <sup>10</sup>                 | 80 Adults                           | <i>Lactobacillus plantarum</i>              | Gastrointestinal                   | NO  | NA           | YES | Daily for 10 days (whole culture 10 <sup>5</sup> / ml) | "7-13 days of treatment increased rates of granulation tissue (relative rate = +17.19) compared to the standard of care for delayed 3 <sup>rd</sup> degree burns. No significant           |

|                |                               |            |                                       |                       |     |              |     |                                                            |                                                                                                                                                                      |
|----------------|-------------------------------|------------|---------------------------------------|-----------------------|-----|--------------|-----|------------------------------------------------------------|----------------------------------------------------------------------------------------------------------------------------------------------------------------------|
|                |                               |            |                                       |                       |     |              |     |                                                            | difference observed in 2 <sup>nd</sup> degree or early 3 <sup>rd</sup> degree burns.”                                                                                |
| Sensitive skin | Gueniche, 2010 <sup>11</sup>  | 66 Adults  | <i>Bifidobacterium longum reuteri</i> | Gastrointestinal      | NO  | lysate       | NO  | Twice daily for 2 months                                   | Significant decrease in skin sensitivity (p < 0.01), significant improved resistance to physical aggression (p < 0.01)                                               |
| Healthy        | Di Marzio, 2008 <sup>12</sup> | 20 elderly | <i>Streptococcus thermophilus</i>     | Skin, plant and dairy | NO  | sonicated    | NO  | Twice daily for 15 days                                    | Significant increase in skin hydration (p = 0.001)                                                                                                                   |
| Healthy        | Nodake, 2015 <sup>13</sup>    | 21 adults  | <i>Staphylococcus epidermis</i>       | Skin                  | YES | freeze-dried | YES | Twice weekly for 4 weeks (1.36 x 10 <sup>9</sup> cells/mL) | Significant increase in hydration , significant decrease in TEWL (p < 0.05), significant increase in lipid content (p < 0.05), significant decrease in pH (p < 0.05) |

1. Nakatsuji, T. *et al.* Clinical improvement in atopic dermatitis following autologous application of microbiome therapy targeting *Staphylococcus aureus*. *Journal of Investigative Dermatology* **138**, S72 (2018).
2. Myles, I. A. *et al.* First-in-human topical microbiome transplantation with *Roseomonas mucosa* for atopic dermatitis. <https://insight.jci.org/articles/view/120608/figure/1> (2018) doi:10.1172/jci.insight.120608.
3. Blanchet-Réthoré, S. *et al.* Effect of a lotion containing the heat-treated probiotic strain *Lactobacillus johnsonii* NCC 533 on *Staphylococcus aureus* colonization in atopic dermatitis. *Clin Cosmet Investig Dermatol* **10**, 249–257 (2017).
4. Marzio, L. D. *et al.* Effect of the lactic acid bacterium *Streptococcus thermophilus* on stratum corneum ceramide levels and signs and symptoms of atopic dermatitis patients. *Experimental Dermatology* **12**, 615–620 (2003).
5. Guéniche, A. *et al.* Effects of nonpathogenic gram-negative bacterium *Vitreoscilla filiformis* lysate on atopic dermatitis: a prospective, randomized, double-blind, placebo-controlled clinical study. *British Journal of Dermatology* **159**, 1357–1363 (2008).
6. Butler, É., Lundqvist, C. & Axelsson, J. *Lactobacillus reuteri* DSM 17938 as a Novel Topical Cosmetic Ingredient: A Proof of Concept Clinical Study in Adults with Atopic Dermatitis. *Microorganisms* **8**, 1026 (2020).
7. Karoglan, A. *et al.* Safety and Efficacy of Topically Applied Selected *Cutibacterium acnes* Strains over Five Weeks in Patients with Acne Vulgaris: An Open-label, Pilot Study. *Acta Dermato-Venereologica* **99**, 1253–1257 (2019).
8. Guéniche, A. *et al.* *Vitreoscilla filiformis* biomass improves seborrheic dermatitis. *J Eur Acad Dermatol Venereol* **22**, 1014–1015 (2008).
9. Peral, M. C., Rachid, M. M., Gobbato, N. M., Martinez, M. A. H. & Valdez, J. C. Interleukin-8 production by polymorphonuclear leukocytes from patients with chronic infected leg ulcers treated with *Lactobacillus plantarum*. *Clinical Microbiology and Infection* **16**, 281–286 (2010).

10. Peral, M. C., Martinez, M. A. H. & Valdez, J. C. Bacteriotherapy with *Lactobacillus plantarum* in burns. *International Wound Journal* **6**, 73–81 (2009).
11. Guéniche, A. *et al.* Bifidobacterium longum lysate, a new ingredient for reactive skin. *Experimental Dermatology* **19**, e1–e8 (2010).
12. Dimarzio, L. *et al.* Increase of Skin-Ceramide Levels in Aged Subjects following a Short-Term Topical Application of Bacterial Sphingomyelinase from *Streptococcus Thermophilus*. *Int J Immunopathol Pharmacol* **21**, 137–143 (2008).
13. Nodake, Y. *et al.* Pilot study on novel skin care method by augmentation with *Staphylococcus epidermidis*, an autologous skin microbe – A blinded randomized clinical trial. *Journal of Dermatological Science* **79**, 119–126 (2015).
